# Supplementary material for: The Association between the Five-Minute Apgar Score and Neurodevelopmental Outcomes among Children Aged 8−66 Months in Australia
Source: MDPI journal article supplement (doi:10.3390/ijerph18126450), 2021-06-15
Supplement: s1 [file s1]

**Table S1: Association between the five-minute Apgar scores (continuous) and neurodevelopmental delay among children aged 8–66 months**

| Factors                                      | Neurodevelopmental delay |         |                     |         |                                    |         |
|----------------------------------------------|--------------------------|---------|---------------------|---------|------------------------------------|---------|
|                                              | Gross motor delay        |         | Communication delay |         | Gross motor or communication delay |         |
|                                              | AOR (95% CI)             | P-Value | AOR (95% CI)        | P-Value | AOR (95% CI)                       | P-Value |
| Five minute Apgar Score                      | 0.72 (0.54, 0.90)        | 0.005   | 0.73 (0.55,0.97)    | 0.03    | 0.74 (0.60, 0.93)                  | 0.01    |
| Mother's country of birth (ref: Australia)   |                          |         |                     |         |                                    |         |
| Not-Australia                                | 1.50 (0.54, 4.14)        | 0.42    | 1.75 (0.53, 5.72)   | 0.35    | 1.29 (0.51, 3.29)                  | 0.58    |
| Mother's age at birth                        | 0.85 (0.69, 1.04)        | 0.13    | 0.88 (0.67, 1.15)   | 0.37    | 0.88 (0.73, 1.05)                  | 0.17    |
| Mother's area of residence (Ref: Major city) |                          |         |                     |         |                                    |         |
| Inner regional                               | 1.05 (0.50, 2.19)        | 0.88    | 0.87 (0.31, 2.44)   | 0.80    | 1.02 (0.52, 1.99)                  | 0.94    |
| Outer regional                               | 0.81 (0.30, 2.18)        | 0.69    | 0.49 (0.11,2.14)    | 0.29    | 0.80 (0.33, 1.95)                  | 0.63    |
| Marital status (Ref: Partnered)              |                          |         |                     |         |                                    |         |
| Non-partnered                                | 1.23 (0.62, 2.41)        | 0.54    | 2.13 (0.96, 4.75)   | 0.06    | 1.24 (0.67, 2.28)                  | 0.48    |
| Smoking during pregnancy (Ref: No)           |                          |         |                     |         |                                    |         |
| Yes                                          | 1.00 (0.28, 3.46)        | 0.99    | 0.41 (0.05, 3.43)   | 0.41    | 1.11 (0.37, 3.30)                  | 0.84    |
| Gestational diabetes (Ref: No)               |                          |         |                     |         |                                    |         |
| Yes                                          | 1.43 (0.56, 3.67)        | 0.44    | 1.82 (0.54, 6.09)   | 0.32    | 1.37 (0.57, 3.29)                  | 0.47    |
| Gestational hypertension (Ref: No)           |                          |         |                     |         |                                    |         |
| Yes                                          | 0.32 (0.04, 2.25)        | 0.25    | 1.02 (0.21, 4.99)   | 0.97    | 0.79 (0.23, 2.75)                  | 0.72    |
| Mode of birth (Ref: Non-caesarean)           |                          |         |                     |         |                                    |         |
| Caesarean                                    | 1.27 (0.70, 2.31)        | 0.42    | 0.97 (0.43, 2.19)   | 0.95    | 1.15 (0.67, 1.98)                  | 0.58    |
| Gestational age at birth (weeks)             | 1.03 (0.83, 1.28)        | 0.75    | 1.03 (0.76, 1.39)   | 0.82    | 0.97 (0.80, 1.18)                  | 0.82    |
| Birth weight (grams)                         | 0.99 (0.99, 1.00)        | 0.42    | 0.99 (0.99, 1.00)   | 0.60    | 0.99 (0.99, 1.00)                  | 0.69    |
| Child age at survey (months)                 | 0.97 (0.95, 1.00)        | 0.06    | 0.98 (0.95, 1.01)   | 0.35    | 0.97 (0.95, 1.00)                  | 0.05    |
| Child sex (Ref: Male)                        |                          |         |                     |         |                                    |         |
| Female                                       | 0.62 (0.34, 1.14)        | 0.12    | 0.80 (0.37, 1.73)   | 0.58    | 0.62 (0.36, 1.08)                  | 0.09    |
| Average screen time per day (hours)          | 0.96 (0.72, 1.28)        | 0.78    | 1.13 (0.80, 1.59)   | 0.66    | 0.87 (0.66, 1.14)                  | 0.32    |
| Child moderate to severe medical problems    |                          |         |                     |         |                                    |         |
| Yes                                          | 2.28 (1.16, 4.49)        | 0.01    | 5.59 (2.59, 12.06)  | <0.001  | 2.71 (1.49, 4.93)                  | 0.01    |

**AOR: Adjusted odds ratio; CI: Confidence interval**
